# Supplementary material for: The surface-to-volume ratio: a key parameter in the thermoelectric transport of topological insulator Bi2Se3nanowires
Source: Royal Society of Chemistry journal article supplement (doi:10.1039/c6nr01716a), 2016-01-01
Supplement: c6nr01716a1.pdf [file c6nr01716a1.pdf]

## Electronic Supplementary Information

### The surface-to-volume ratio: a key parameter in the thermoelectric transport of topological insulator Bi<sub>2</sub>Se<sub>3</sub> nanowires

Ho Sun Shin<sup>a†\*</sup>, Bacel Hamdou<sup>a</sup>, Heiko Reith<sup>b</sup>, Hermann Osterhage<sup>a</sup>, Johannes Gooth<sup>a</sup>, Christine Damm<sup>b</sup>, Bernd Rellinghaus<sup>b</sup>, Eckhard Pippel<sup>c</sup> and Kornelius Nielsch<sup>b\*</sup>

<sup>a</sup> Institute of Nanostructure and Solid State Physics, University of Hamburg, Jungiusstrasse 11, 20355 Hamburg, Germany

<sup>b</sup> Institute of Metallic Materials, Leibniz Institute for Solid State and Materials Research, Helmholtzstrasse 20, 01069 Dresden, Germany

<sup>c</sup> Max Planck Institute of Microstructure Physics, Weinberg 2, 06120 Halle, Germany

<sup>†</sup> Current address: Materials Genome Center, Korea Research Institute of Standards and Science, Daejeon 305-340, Republic of Korea

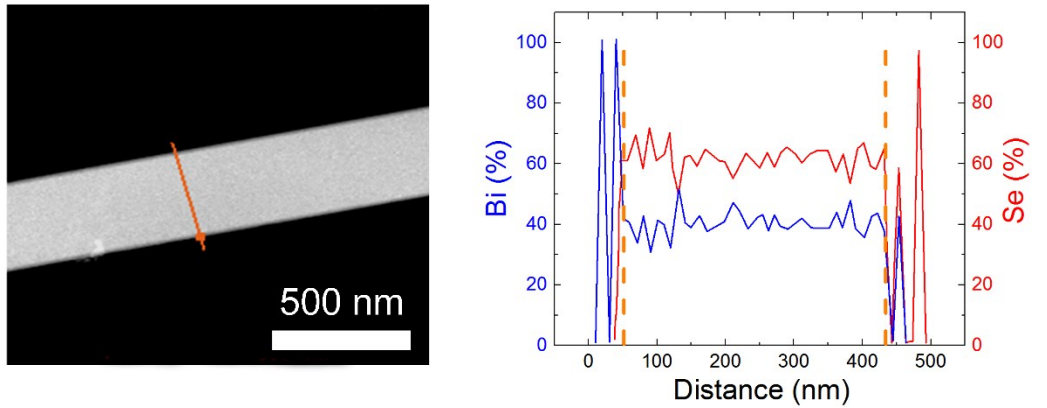

S1. A scanning TEM image of a  $\text{Bi}_2\text{Se}_3$  NW (left) and an EDX line profile (right) across the width. Within the error limit, the chemical composition of the  $\text{Bi}_2\text{Se}_3$  NW was identified to be 2:3 stoichiometric phase. There is no meaningful change in composition between the NW's core and the edges.

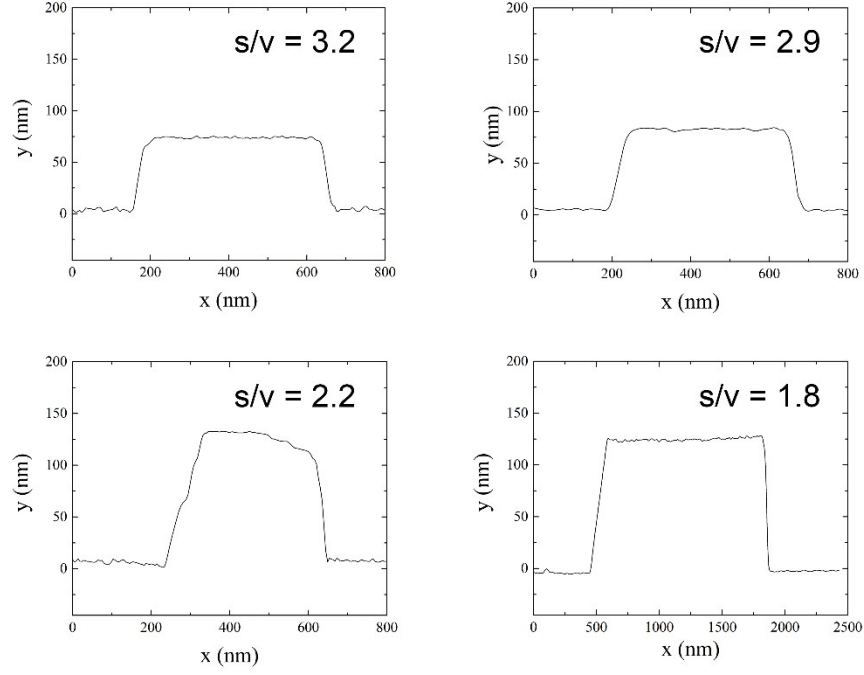

S2. AFM profiles used for determining the  $s/v$  of  $\text{Bi}_2\text{Se}_3$  NWs. The  $s/v$  of  $3.2 \times 10^{-2} \text{ nm}^{-1}$  for the NW1 was confirmed by TEM cross-section imaging. Due to the fact that AFM cannot measure steep walls or overhangs, the uncertainty of the  $s/v$  becomes larger as the dimensions of NWs decrease, as shown in Figure 3.

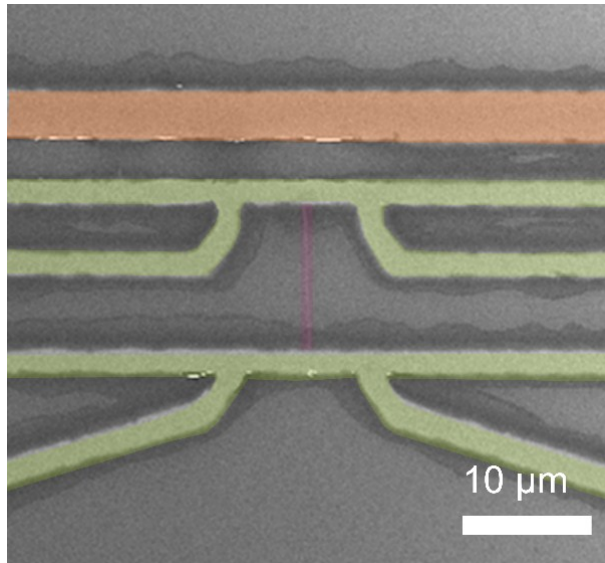

S3. SEM image of the microdevice used for thermoelectric measurement. The heating line (light orange) generates a temperature gradient along the NW, and two pairs of 4-point thermometer (light green) read the temperature difference at the hot and cold end of the NW from their resistance change. The Seebeck voltage is measured as the voltage difference between the hot and cold end.

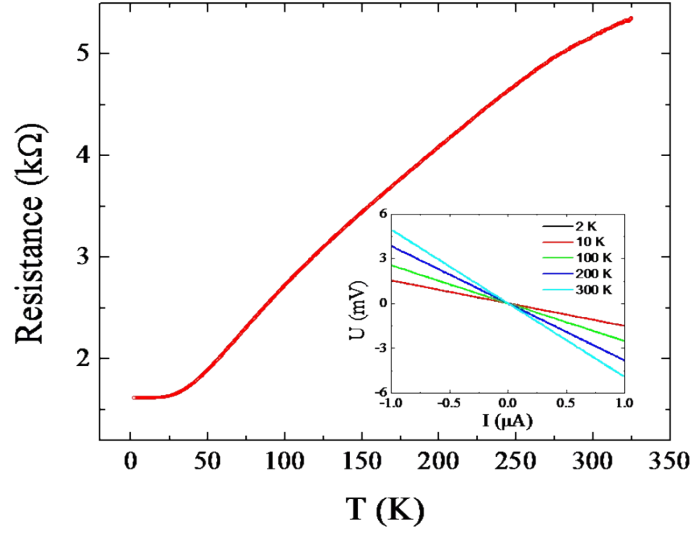

S4. A typical temperature-dependent resistance of  $\text{Bi}_2\text{Se}_3$  NWs from 300 K to 2 K. The resistance decreases with decreasing temperature and seems saturated below 20 K. Considering the Fermi level of 47 meV off the Dirac point, the metallic R-T behavior is attributed to a surface-dominated transport due to the large  $s/v$  of the NWs. The inset shows the V-I curves measured at different temperatures. The linear slopes indicate Ohmic contact in the measurement temperature range.

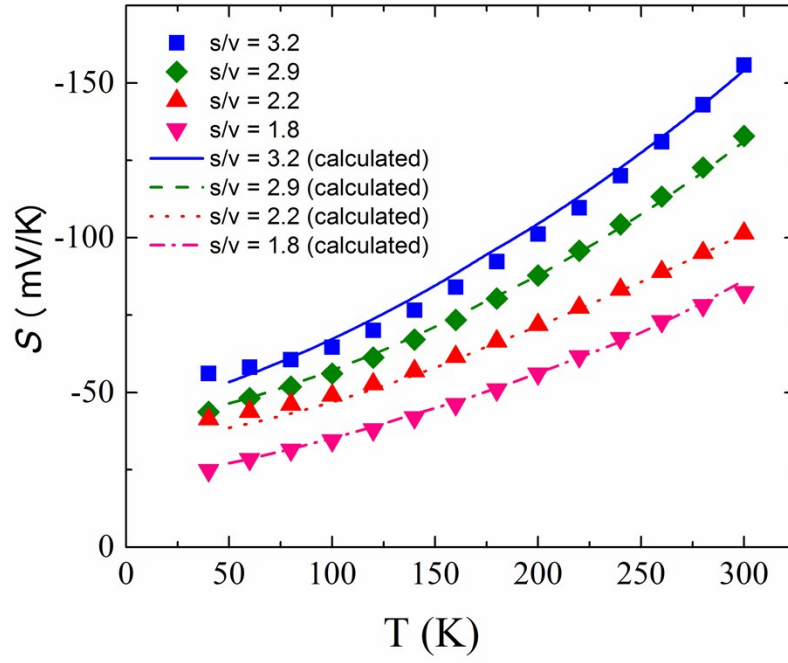

S5. Temperature-dependent Seebeck coefficients of  $\text{Bi}_2\text{Se}_3$  NWs (symbols). The lines are the simulated Seebeck coefficients for the  $\text{Bi}_2\text{Se}_3$  NWs with the same  $s/v$  at a Fermi level of 200 meV based on the two-channel model.
